# Supplementary material for: Putative bovine topological association domains and CTCF binding motifs can reduce the search space for causative regulatory variants of complex traits
Source: BMC Genomics. 2018 May 24;19:395. doi: 10.1186/s12864-018-4800-0 (PMC5968476; doi:10.1186/s12864-018-4800-0)
Supplement: Supplementary file 2 — Table S2. Putative bovine TAD genomic coordinates. This table provides the genomic coordinates of putative bovine TADs. First and second columns (i.e. input TAD cell/tissue type and input TAD reference genome) specify the input bovine TAD set. Third, fourth and fifth columns respectively specify the chromosome number, start and end positions of the putative bovine TADs. (XLSX 22 kb) [file 12864_2018_4800_MOESM2_ESM.xlsx]

## Sheet: genomic conversion
study that generated the input mammalian TAD data	cell/tissue	reference genome		threshold of gap width: Was used in merging output genomic fragments in every step of the genomic conversion	number of TADs	number of queries that were not mapped to target	number of query that were mapped to 1 unique location in target	ratio of query sequence mapped to a single unique location in target	minimum target locations that a query mapped to (exclude unmapped)	maximum target locations that a query mapped to	number of queries that mapped to a single target chromosome despite intrachromosomal splits	ratio of query sequence mapped to a single chromosome in target despite splits	ratio of input TADs that were mapped to target	ratio of the difference between the total query widths and the total target widths to the total query widths	chromosomes that had no TADs in the data	ratio of the total TAD widths to the total genome lengths (Round to 2nd decimal)	proportion of the genome that is covered by only n TAD(s) in a TAD set			number of inter-chromosomal splits that a query generated (Round to Ones)							TAD widths mesured in base pair (Round to Ones)							Gap widths measured in base pair (Round to Ones)
study	ct	Refseq		elen	nbRegions	nbMapped0	nbMapped1	nbMapped1%	minNbMapped	maxNbMapped	nb1qChrTo1tChr	nb1qChrTo1tChr%	mappingRate	shrinkRate	chrUncovered	oTADratio	n=1	n=2	n=3	Min	1stQu	Median	Mean	3rdQu	Max	Sd	Min	1stQu	Median	Mean	3rdQu	Max	Sd	Min	1stQu	Median	Mean	3rdQu	Max	Sd
Dixon2012	hESC	hg18		80001	3127	NA									chrY, chrM	0.8816	NA			NA							80000	440000	680000	852200	1080000	4440000	570797	40000	40000	80000	273100	160000	28840000	1468746
		hg19			3225	0	2891	0.924528	1	395	3114	0.995843	1	0.0025	chrM	0.8587				1	1	1	1	1	12	0	26	440000	679600	824300	1080000	4440000	575854	7502	40000	80000	316300	160000	59360000	2181209
		bostau6	stage 1		49735	57	1	0.000310078	1	54454	34	0.0105426	1	0.0025	chrY	0.9288	0.8856	0.033	0.0054	0	6	10	10	14	31	6	2	166	455	53310	1662	5015000	234536	1	4619	22790	41200	53040	1079000	59097
			stage 2	NA	3153		2784	0.89031	1	5	2930	0.937	0.9453	0.0906	chrY, chrM	0.9004	0.891	0.0086	0.0005	2	2	2	2	2	4	1	200100	383300	594000	768600	966700	5015000	560705	1	6044	48500	126500	155900	6718000	265420
			final		2885												0.9004	0	0								200100	406800	638500	830500	1046000	5491000	616735
	IMR90	hg18		120001	2349	NA									chrY, chrM	0.8722	NA			NA							120000	520000	840000	1122000	1440000	13000000	892464	40000	40000	80000	321200	200000	22880000	1451717
		hg19			2440	0	2105	0.896126	1	1094	2335	0.99404	1	0.005	chrM	0.8473				1	1	1	1	1	12	0	26	480000	800000	1075000	1400000	7880000	863976	5584	40000	80000	371400	200000	59360000	2230016
		bostau6	stage 1		47470	53	2	0.000819672	1	74945	28	0.0114754	1	-0.0083	chrY	0.9208	0.875	0.0341	0.0065	0	7	11	12	16	31	7	1	163	441	55720	1480	8403000	289950	1	6838	26630	51440	63520	1079000	76315
			stage 2	NA	2499		2050	0.872712	1	5	2198	0.935717	0.9625	0.0776	chrY, chrM	0.9001	0.8895	0.0089	0.001	2	2	2	2	2	5	1	200100	427900	707600	973100	1216000	8403000	835019	1	13990	51360	155000	171300	6346000	347567
			final		2236												0.9001	0	0								200100	454800	766800	1071000	1351000	8403000	928790
	mESC	mm9		160001	2200	NA									chrY, chrM	0.911	NA			NA							160000	560000	880000	1093000	1440000	5240000	740434	40000	40000	80000	233400	160000	9280000	662555
		bostau6	stage 1		34797	0	0	0	51	47886	11	0.005	1	-0.0774	chrY	0.9179	0.8821	0.0273	0.005	1	7	11	11	14	27	5	25	177	501	74440	1779	6505000	323094	1	6884	27880	58430	69820	1566000	93330
			stage 2	NA	2382		1912	0.869091	1	5	2041	0.927727	0.9668	-0.0127	chrY, chrM	0.9012	0.8909	0.0084	0.0014	2	2	2	2	2	5	1	200700	478000	807300	1022000	1350000	6505000	745511	1	8095	49990	138800	170700	6625000	284351
			final		2173												0.9012	0	0								201100	513600	861200	1104000	1455000	6984000	813972
	cortex	mm9		200001	1519	NA									chrY, chrM	0.8873	NA			NA							200000	760000	1320000	1542000	2080000	9120000	1029234	40000	40000	120000	268300	240000	9280000	649150
		bostau6	stage 1		32459	0	0	0	106	60613	5	0.00329164	1	-0.0928	chrY	0.9071	0.8708	0.0283	0.0049	1	9	13	14	18	30	6	25	172	486	78840	1576	6764000	389554	1	11310	36440	67780	84850	1566000	98665
			stage 2	NA	1786		1283	0.844635	1	7	1401	0.922317	0.9888	-0.0327	chrY, chrM	0.8938	0.8822	0.0098	0.0012	2	2	2	2	3	7	1	200700	598500	1056000	1354000	1887000	6764000	1015460	4	34700	88750	186300	226900	6629000	330866
			final		1597												0.8938	0	0								202800	659800	1159000	1489000	2006000	10150000	1134002
Rudan2015	liver	mm10		63000	3643	NA									chrY, chrM	0.9613	NA			NA							63000	252000	404000	695000	696000	13150000	985649	94180	230200	3047000	2546000	3543000	7723000	2356069
		bostau7			36914	4	0	0	8	65033	146	0.0400769	0.9989	0.0339	NA	0.8768				0	4	6	7	9	30	5	17	202	585	66260	4397	6594000	231410	1	4166	25080	57270	77210	4716000	151738
		bostau6	stage 1		68173	106	25984	0.703906	1	2065	32679	0.885274	0.9989	-0.0098	chrY	0.8747	0.8377	0.0296	0.0046	0	1	1	2	1	30	2	1	78	331	36230	1291	3966000	164412	1	3208	13940	31840	40360	1124000	50867
			stage 2	NA	3775		2388	0.655504	1	13	2873	0.788636	0.7963	0.1595	chrY, chrM	0.7941	0.7893	0.0041	0.0004	2	2	2	3	3	7	2	200000	291800	424000	563700	650800	3966000	430626	1	4555	61770	182700	195800	6748000	437196
			final		3507												0.7941	0	0								200000	300300	447200	602500	711200	5402000	476216
		canfam3		55000	3315	NA									chrY, chrM	0.9777	NA			NA							55000	276000	434000	686500	754000	12560000	815306	35	14100	268800	664600	891200	4201000	964835
		canfam2			6899	0	317	0.0956259	1	4667	2527	0.762293	1	-0.0008	chrM	0.9297				1	1	1	2	1	32	3	21	60	3766	330200	422100	12560000	655074	35	15720	85940	599200	339000	4747000	1103860
		bostau6	stage 1		57674	3495	89	0.0129004	1	159709	399	0.120362	1	-0.1547	chrY	0.9496	0.9244	0.0199	0.0031	0	0	1	5	8	31	7	1	158	411	45600	1233	13720000	269993	1	1808	12890	39420	52090	1095000	67952
			stage 2	NA	3150		2731	0.823831	1	7	2887	0.87089	0.8796	-0.0637	chrY, chrM	0.9068	0.904	0.0027	0.0001	2	2	2	3	3	7	1	200100	336000	497000	768500	841900	13720000	879046	1	1047	32410	165900	178900	6406000	419926
			final		2979												0.9068	0	0								200100	344800	519000	810000	895600	13720000	927768
